# Supplementary material for: Identification of RTS,S/AS01 vaccine–induced humoral biomarkers predictive of protection against controlled human malaria infection
Source: PubMed Central journal article supplement (PMC11466194; doi:10.1172/jci.insight.178801), 2024-10-08
Supplement: jciinsight-9-178801-s198.pdf [file jciinsight-9-178801-s198.pdf]

## Supplemental Information

**Supplemental Table 1. Reagents.** List of reagents, including antigens, positive controls standards, and detection antibodies for BAMA and BLI.

| Assay     | Antigen                           | Epitope                                                        | Sequence                                                                                                                                                                                                                                                                                                                                    | Source                                                    | Reference                                                                                                                                          |
|-----------|-----------------------------------|----------------------------------------------------------------|---------------------------------------------------------------------------------------------------------------------------------------------------------------------------------------------------------------------------------------------------------------------------------------------------------------------------------------------|-----------------------------------------------------------|----------------------------------------------------------------------------------------------------------------------------------------------------|
| BAMA, BLI | Recombinant CSP                   | N-terminal region, central repeat region and C-terminal region | MAHHHHHHHPGMYGSSSNTRVLNELNYDNAGTNLYNELEMNYYGKQENWYS<br>LKKNSRSLGENDDGNNEDEKLRKPKHKKLLKQPADGNPDPNANPNVDPNAN<br>PNVDPNANPNVDPNANPNANPNANPNANPNANPNANPNANPNANPNANPNANPN<br>ANPNANPNANPNANPNANPNANPNANPNANPNKNNQNGQGHNMPNDPNRNVD<br>ENANANSAVKNNNNNEEPSDKHIKEYLNKIQNSLSTEWSPCSVTCGNGIQVRIK<br>PGSANKPKDEL DYANDIEKKICKMEKCSSVFNVVNSGGRLEHHHHHHH | Walter Reed Army Institute of Research, Silver Spring, MD | Schwenk, R., et al., PLoS One, 2014. 9(10): p. e111020                                                                                             |
| BAMA      | EP070034                          | Central Repeat                                                 | NANPNANPNANPNANPNANPNANPC                                                                                                                                                                                                                                                                                                                   | Biomatik, Cambridge, ON, Canada                           |                                                                                                                                                    |
| BLI       | NANP6                             | Central Repeat                                                 | biotin-Ahx-NANPNANPNANPNANPNANPNANP                                                                                                                                                                                                                                                                                                         | CPC Scientific, Sunnyvale, CA                             |                                                                                                                                                    |
| BLI       | N Interface                       | N-terminal junctional region                                   | biotin-Ahx-KQPADGNPDPNANPN                                                                                                                                                                                                                                                                                                                  | CPC Scientific, Sunnyvale, CA                             |                                                                                                                                                    |
| BLI       | C1                                | Negative control peptide                                       | biotin-KKMVEDVLSLWDQSLKPCVKLTPLCV                                                                                                                                                                                                                                                                                                           | CPC Scientific, Sunnyvale, CA                             |                                                                                                                                                    |
| BLI       | Ovalbumin                         | Negative control protein                                       |                                                                                                                                                                                                                                                                                                                                             | Cytiva, Marlborough, MA                                   |                                                                                                                                                    |
| Assay     | Monoclonal Antibodies             | Clone Number                                                   | Catalog Number                                                                                                                                                                                                                                                                                                                              | Source                                                    |                                                                                                                                                    |
| BAMA      | Purified Anti-Human IgG1 Antibody | 12G8G11                                                        | 94796                                                                                                                                                                                                                                                                                                                                       | BioLegend, San Diego, CA                                  |                                                                                                                                                    |
| BAMA      | Mouse Anti-Human IgG3             | HP6047                                                         | 53600                                                                                                                                                                                                                                                                                                                                       | Life Technologies, Carlsbad, CA                           |                                                                                                                                                    |
| BAMA, BLI | AB334 IgG1                        | N/A                                                            | N/A                                                                                                                                                                                                                                                                                                                                         | Duke Human Vaccine Institute, Protein Production Facility | Dennison et al J Immunol (2018) 201(4):1315-26, Regules et al J Infect Dis (2016) 214(5):762-71 and Williams et al Nat. Med. (2024) 30(1):117-129. |
| BAMA      | AB334 IgG3                        | N/A                                                            | N/A                                                                                                                                                                                                                                                                                                                                         | SriSai Pharmaceuticals                                    |                                                                                                                                                    |
| Assay     | Polyclonal Antibodies             |                                                                | Catalog Number                                                                                                                                                                                                                                                                                                                              | Source                                                    |                                                                                                                                                    |
| BAMA      | Goat Anti-Mouse IgG, Human ads-PE |                                                                | 1030-09                                                                                                                                                                                                                                                                                                                                     | BD Pharmingen, San Jose, CA                               |                                                                                                                                                    |



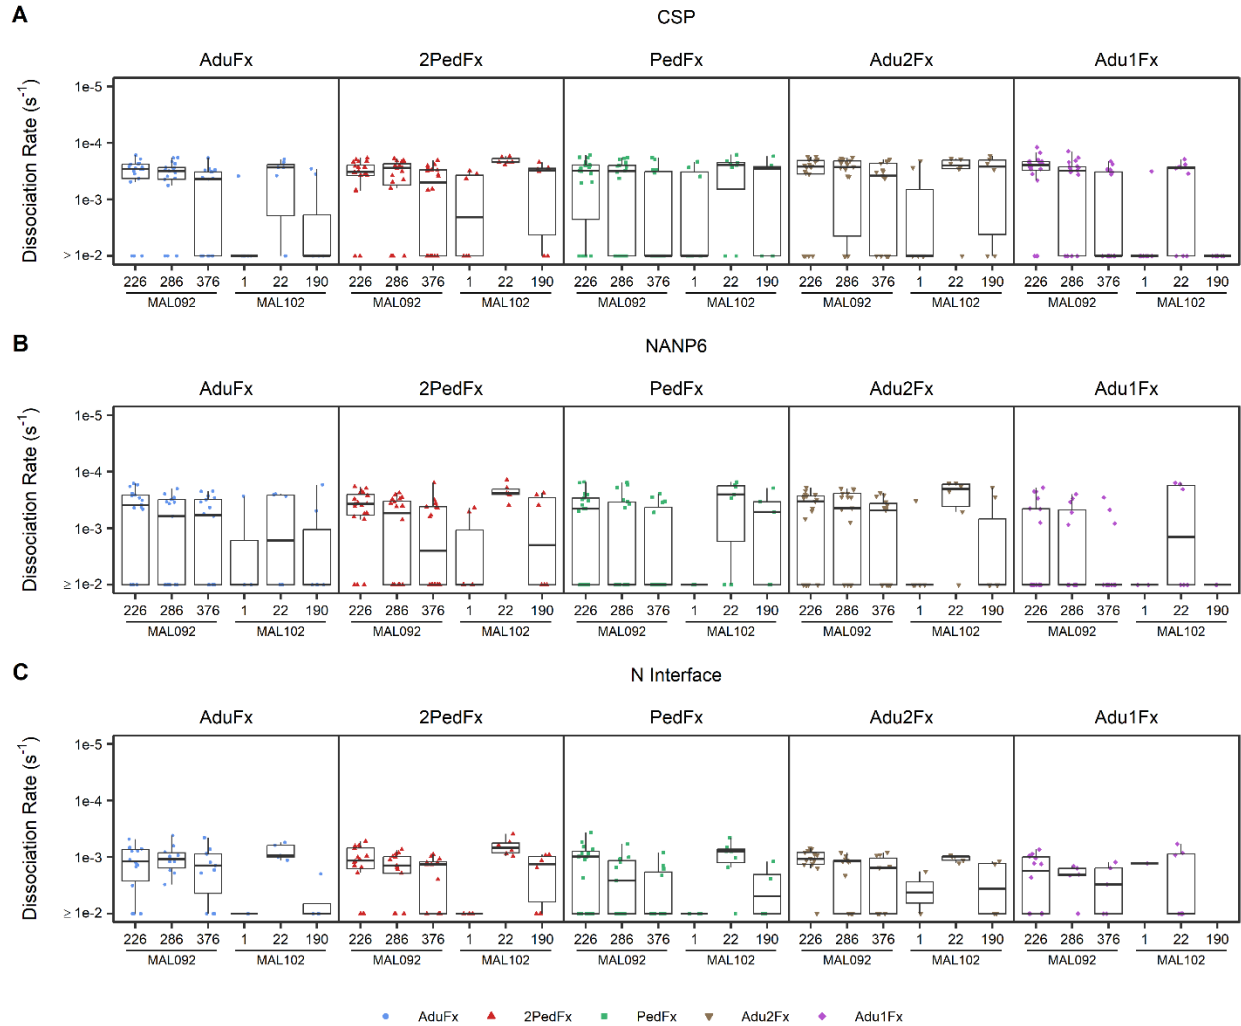

**Supplemental Figure 2. Dissociation rates of serum Ig induced by different RTS,S/AS01 regimens.** CSP-specific (A), NANP6-specific (B), and N Interface-specific (C) dissociation rates measured by BLI are plotted for MAL092 days 226, 286, 376 and MAL102 days 1, 22, and 190 as in S1 Fig. Dissociation rates are shown as  $\geq 1e-2$  for positive binding responses  $< \text{LLOQ}$  and are not shown for negative responses.

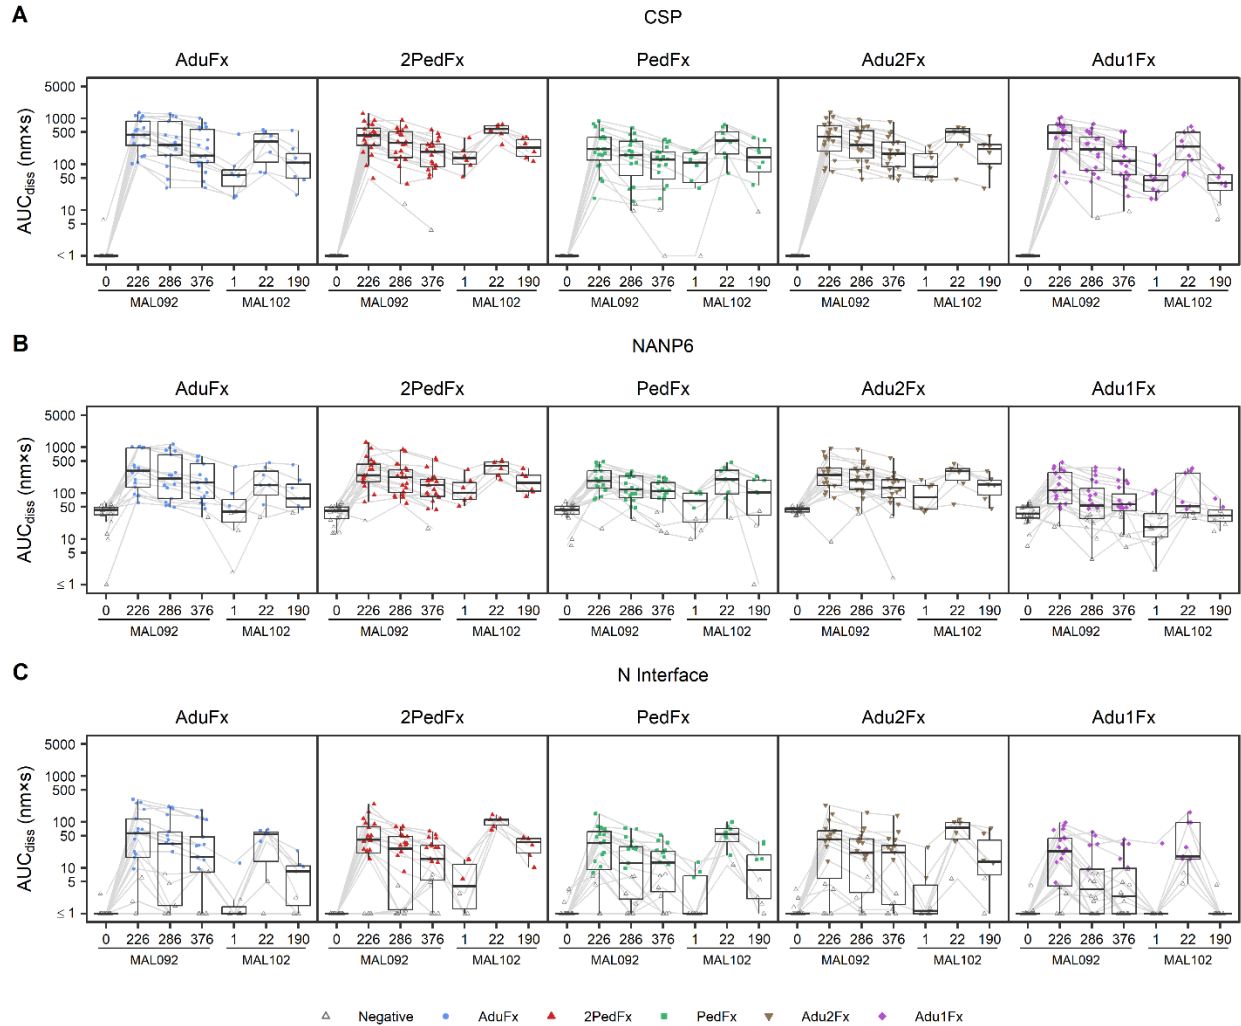

**Supplemental Figure 3. Magnitude and avidity of serum Ig induced by different RTS,S/AS01 regimens.** Plots show the CSP-specific (A), NANP6-specific (B), and N Interface-specific (C)  $AUC_{diss}$  measured by BLI at MAL092 days 0, 226, 286, 376, and MAL102 days 1, 22, and 190 as in S1 Fig.

**Supplemental Table 2. Descriptive statistics for serum Ig binding magnitude and avidity in RTS,S/AS01 vaccinees from MAL092 and MAL102 studies.** Response rates and median and range of AUC<sub>diss</sub> (nm × s) measured by BLI are shown by study day and regimen. Response rates reflect the proportion of responses above the respective antigen-specific positivity limits as described in the Methods section.

| Study Day | MAL092 Regimen | n  | CSP           |                     |                 | NANP6         |                     |                | N Interface   |                     |                |
|-----------|----------------|----|---------------|---------------------|-----------------|---------------|---------------------|----------------|---------------|---------------------|----------------|
|           |                |    | Response Rate | AUC <sub>diss</sub> | median (range)  | Response Rate | AUC <sub>diss</sub> | median (range) | Response Rate | AUC <sub>diss</sub> | median (range) |
| MAL092    |                |    |               |                     |                 |               |                     |                |               |                     |                |
| 0         | AduFx          | 17 | 0.0%          | 0.0                 | (0.0, 6.1)      | 58.8%         | 42.7                | (0.9, 58.2)    | 0.0%          | 0.0                 | (0.0, 2.7)     |
| 0         | 2PedFx         | 20 | 0.0%          | 0.0                 | (0.0, 0.0)      | 50.0%         | 40.5                | (13.2, 62.2)   | 0.0%          | 0.0                 | (0.0, 1.0)     |
| 0         | PedFx          | 19 | 0.0%          | 0.0                 | (0.0, 0.0)      | 57.9%         | 42.9                | (7.1, 64.0)    | 0.0%          | 0.0                 | (0.0, 3.5)     |
| 0         | Adu2Fx         | 18 | 0.0%          | 0.0                 | (0.0, 0.0)      | 66.7%         | 43.6                | (32.0, 56.2)   | 0.0%          | 0.0                 | (0.0, 3.3)     |
| 0         | Adu1Fx         | 20 | 0.0%          | 0.0                 | (0.0, 0.0)      | 50.0%         | 35.7                | (7.0, 63.8)    | 0.0%          | 0.0                 | (0.0, 4.1)     |
| 226       | AduFx          | 17 | 100.0%        | 439.4               | (101.6, 1343.4) | 100.0%        | 305.0               | (61.4, 1045.1) | 82.4%         | 56.3                | (0.0, 310.0)   |
| 226       | 2PedFx         | 20 | 100.0%        | 426.9               | (49.0, 1273.3)  | 95.0%         | 242.7               | (24.2, 1277.4) | 80.0%         | 41.1                | (0.0, 244.5)   |
| 226       | PedFx          | 19 | 100.0%        | 214.5               | (18.1, 886.5)   | 94.7%         | 183.3               | (16.7, 481.8)  | 78.9%         | 34.7                | (0.0, 150.9)   |
| 226       | Adu2Fx         | 18 | 100.0%        | 400.1               | (69.8, 1368.8)  | 94.4%         | 249.6               | (8.6, 944.9)   | 72.2%         | 41.6                | (0.0, 232.5)   |
| 226       | Adu1Fx         | 20 | 100.0%        | 486.8               | (39.9, 1057.2)  | 90.0%         | 115.6               | (18.3, 467.7)  | 70.0%         | 22.9                | (0.0, 97.3)    |
| 286       | AduFx          | 17 | 100.0%        | 261.5               | (30.3, 1243.2)  | 100.0%        | 206.2               | (49.1, 1165.6) | 58.8%         | 33.1                | (0.0, 215.4)   |
| 286       | 2PedFx         | 20 | 95.0%         | 292.5               | (13.5, 907.9)   | 100.0%        | 219.8               | (59.8, 886.6)  | 65.0%         | 26.4                | (0.0, 79.3)    |
| 286       | PedFx          | 19 | 89.5%         | 158.5               | (9.5, 624.2)    | 94.7%         | 119.3               | (27.1, 301.5)  | 57.9%         | 12.6                | (0.0, 73.2)    |
| 286       | Adu2Fx         | 18 | 100.0%        | 260.7               | (47.4, 940.9)   | 94.4%         | 192.5               | (34.9, 895.0)  | 66.7%         | 21.2                | (0.0, 160.2)   |
| 286       | Adu1Fx         | 20 | 95.0%         | 211.7               | (6.8, 759.7)    | 60.0%         | 53.6                | (3.6, 363.0)   | 25.0%         | 3.7                 | (0.0, 60.1)    |
| 376       | AduFx          | 17 | 100.0%        | 152.6               | (30.8, 1016.8)  | 94.1%         | 169.6               | (29.5, 641.5)  | 64.7%         | 17.2                | (0.1, 179.2)   |
| 376       | 2PedFx         | 19 | 94.7%         | 187.3               | (3.7, 557.1)    | 94.7%         | 148.9               | (16.9, 570.8)  | 63.2%         | 15.5                | (0.0, 62.4)    |
| 376       | PedFx          | 19 | 89.5%         | 125.5               | (0.0, 352.4)    | 78.9%         | 110.0               | (13.4, 226.9)  | 57.9%         | 13.0                | (0.1, 52.1)    |
| 376       | Adu2Fx         | 17 | 100.0%        | 169.7               | (45.7, 841.1)   | 88.2%         | 130.3               | (1.4, 579.2)   | 58.8%         | 21.6                | (0.0, 138.5)   |
| 376       | Adu1Fx         | 19 | 94.7%         | 117.2               | (9.4, 522.5)    | 73.7%         | 56.6                | (6.6, 336.5)   | 26.3%         | 2.4                 | (0.0, 41.6)    |
| MAL102    |                |    |               |                     |                 |               |                     |                |               |                     |                |
| 1         | AduFx          | 7  | 100.0%        | 57.5                | (18.3, 449.8)   | 42.9%         | 39.0                | (1.8, 373.6)   | 14.3%         | 0.5                 | (0.0, 12.6)    |
| 1         | 2PedFx         | 6  | 100.0%        | 135.2               | (53.1, 373.5)   | 100.0%        | 104.3               | (52.3, 323.4)  | 50.0%         | 4.3                 | (0.0, 15.2)    |
| 1         | PedFx          | 8  | 87.5%         | 109.7               | (0.0, 198.4)    | 62.5%         | 72.2                | (9.8, 105.6)   | 37.5%         | 0.7                 | (0.0, 13.3)    |
| 1         | Adu2Fx         | 6  | 100.0%        | 96.2                | (44.1, 251.3)   | 100.0%        | 92.2                | (39.4, 195.2)  | 33.3%         | 0.7                 | (0.0, 28.1)    |
| 1         | Adu1Fx         | 9  | 100.0%        | 44.9                | (17.2, 157.4)   | 22.2%         | 18.1                | (2.1, 114.6)   | 11.1%         | 0.0                 | (0.0, 34.1)    |
| 22        | AduFx          | 7  | 100.0%        | 314.5               | (64.7, 564.5)   | 85.7%         | 149.5               | (29.7, 459.5)  | 71.4%         | 54.0                | (0.3, 69.0)    |
| 22        | 2PedFx         | 6  | 100.0%        | 591.4               | (265.9, 729.6)  | 100.0%        | 398.3               | (197.0, 516.3) | 100.0%        | 111.5               | (67.3, 143.7)  |
| 22        | PedFx          | 8  | 100.0%        | 327.9               | (63.2, 720.4)   | 87.5%         | 197.2               | (27.7, 467.6)  | 87.5%         | 54.4                | (11.5, 100.8)  |
| 22        | Adu2Fx         | 6  | 100.0%        | 512.4               | (47.6, 638.6)   | 100.0%        | 299.3               | (57.5, 438.1)  | 83.3%         | 76.7                | (5.7, 115.2)   |
| 22        | Adu1Fx         | 9  | 100.0%        | 242.7               | (57.2, 667.5)   | 66.7%         | 51.9                | (28.3, 349.1)  | 77.8%         | 17.8                | (4.5, 162.5)   |
| 190       | AduFx          | 7  | 100.0%        | 108.2               | (21.4, 548.6)   | 85.7%         | 76.3                | (36.2, 416.2)  | 57.1%         | 8.3                 | (0.0, 23.9)    |
| 190       | 2PedFx         | 6  | 100.0%        | 234.4               | (114.7, 386.4)  | 100.0%        | 175.1               | (84.8, 343.5)  | 100.0%        | 36.6                | (10.2, 46.3)   |
| 190       | PedFx          | 8  | 87.5%         | 145.4               | (9.1, 374.8)    | 62.5%         | 102.8               | (0.0, 233.9)   | 50.0%         | 10.2                | (0.5, 37.1)    |
| 190       | Adu2Fx         | 6  | 100.0%        | 215.4               | (30.0, 422.9)   | 100.0%        | 152.7               | (46.2, 304.6)  | 66.7%         | 13.6                | (0.0, 73.9)    |
| 190       | Adu1Fx         | 8  | 75.0%         | 38.8                | (6.2, 93.9)     | 25.0%         | 32.1                | (14.5, 75.6)   | 0.0%          | 0.0                 | (0.0, 4.2)     |

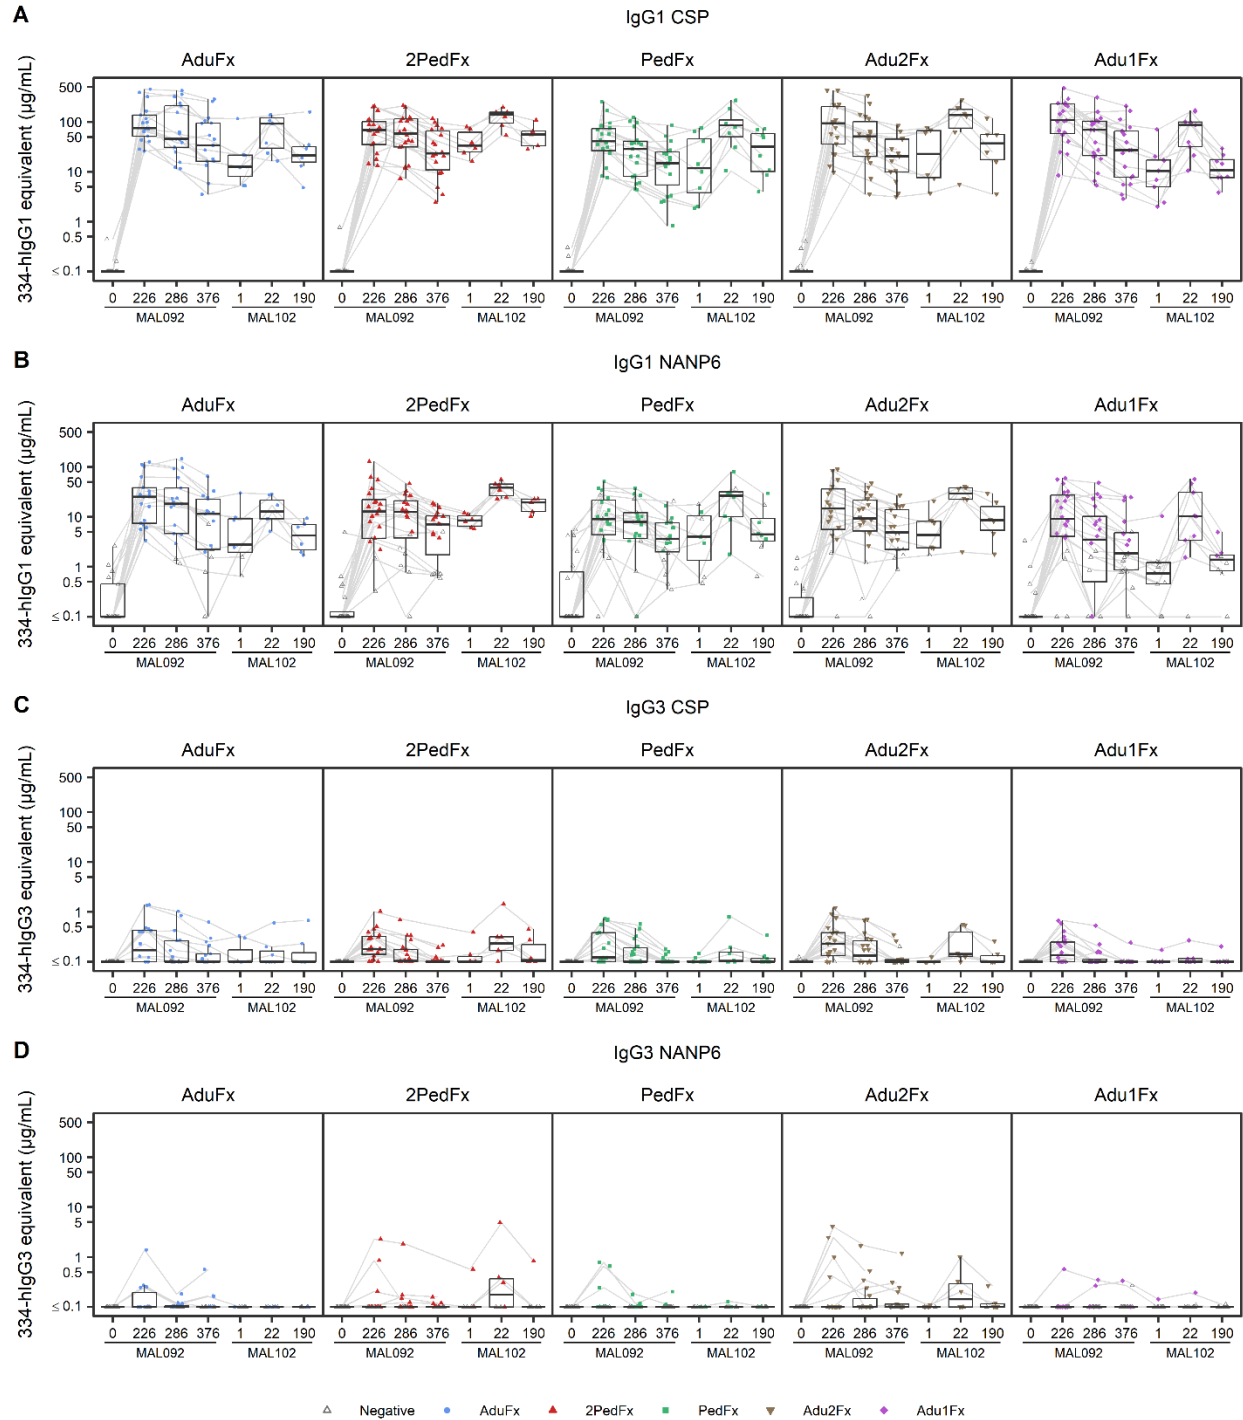

**Supplemental Figure 4. Magnitude of RTS,S/AS01 induced antibody subclass binding in different regimens.** Plots show the IgG1 CSP (A), IgG1 NANP6 (B), IgG3 CSP (C), and IgG3 NANP6 (D) 334-hlgG1/hlgG3 equivalent concentration measured by BAMA at MAL092 days 0, 226, 286, 376, and MAL102 days 1, 22, and 190 as in S1 Fig.

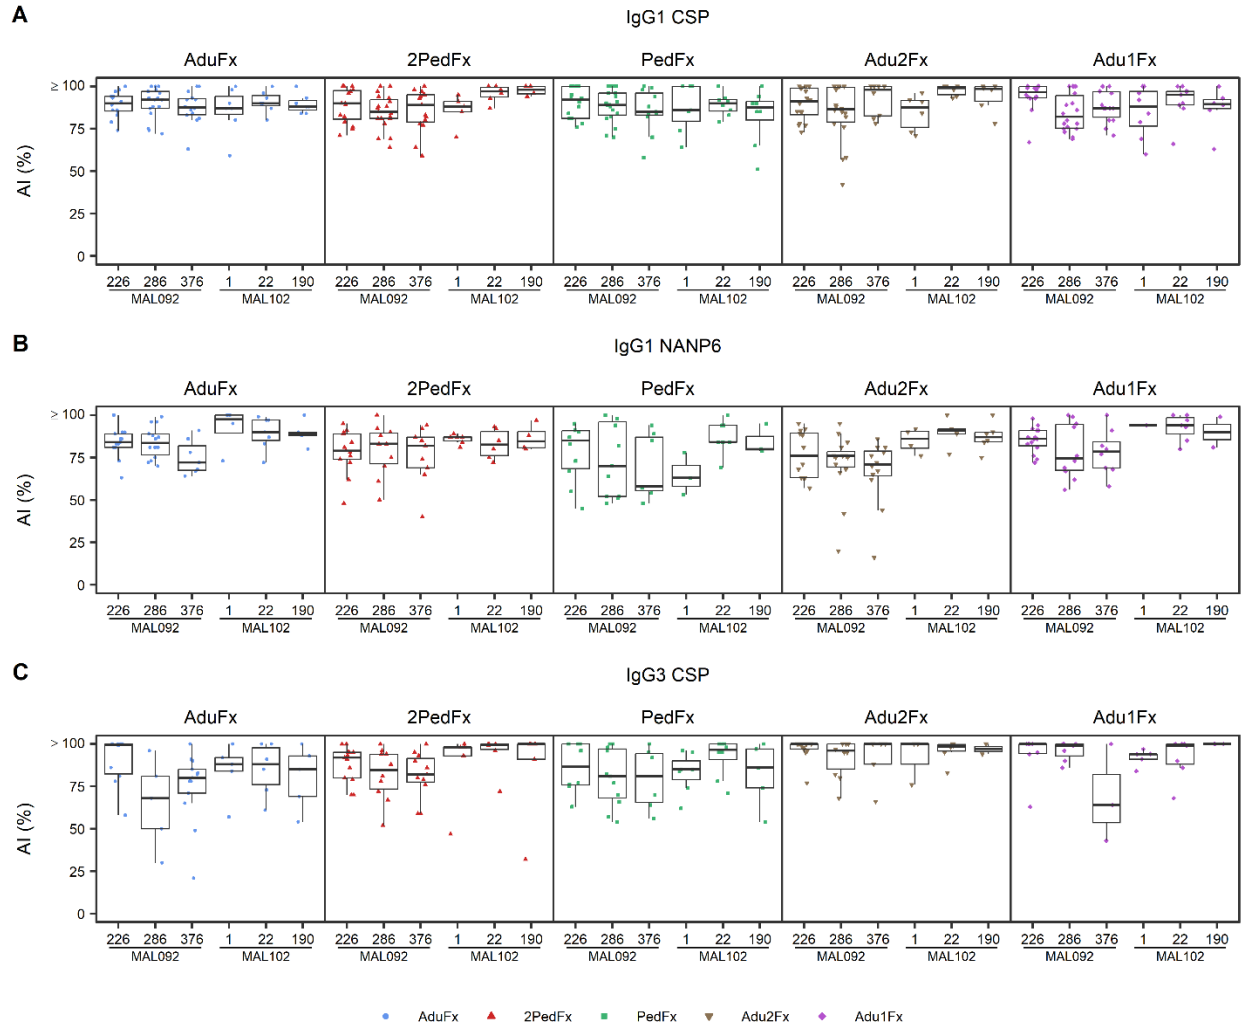

**Supplemental Figure 5. Antibody subclass binding avidity in different RTS,S/AS01 regimens.** Plots show the IgG1 CSP (A), IgG1 NANP6 (B), and IgG3 CSP (C) AI measured by BAMA at MAL092 days 226, 286, 376, and MAL102 days 1, 22, and 190 as in S1 Fig.

**Supplemental Table 3. Descriptive statistics for antibody subclass binding magnitude in RTS,S/AS01 vaccinees from MAL092 and MAL102 studies.** Response rates and median and range of 334-hIgG1/hIgG3 equivalent ( $\mu\text{g/mL}$ ) measured by BAMA are shown by study day and regimen. Response rates reflect proportion of positive vaccine responders as defined in the Methods section.

| Study Day | MAL092 Regimen | n  | IgG1 CSP      |                                 | IgG1 NANP6    |                                 | IgG3 CSP      |                                 | IgG3 NANP6    |                                 |
|-----------|----------------|----|---------------|---------------------------------|---------------|---------------------------------|---------------|---------------------------------|---------------|---------------------------------|
|           |                |    | Response Rate | $\mu\text{g/mL}$ median (range) | Response Rate | $\mu\text{g/mL}$ median (range) | Response Rate | $\mu\text{g/mL}$ median (range) | Response Rate | $\mu\text{g/mL}$ median (range) |
| MAL092    |                |    |               |                                 |               |                                 |               |                                 |               |                                 |
| 0         | AduFx          | 17 | 0.0%          | 0.01 (0.01, 0.45)               | 0.0%          | 0.10 (0.10, 2.58)               | 0.0%          | 0.00 (0.00, 0.02)               | 0.0%          | 0.01 (0.01, 0.03)               |
| 0         | 2PedFx         | 20 | 0.0%          | 0.02 (0.01, 0.76)               | 0.0%          | 0.10 (0.10, 4.89)               | 0.0%          | 0.00 (0.00, 0.00)               | 0.0%          | 0.01 (0.01, 0.01)               |
| 0         | PedFx          | 19 | 0.0%          | 0.01 (0.01, 0.30)               | 0.0%          | 0.10 (0.10, 5.50)               | 0.0%          | 0.00 (0.00, 0.06)               | 0.0%          | 0.01 (0.01, 0.01)               |
| 0         | Adu2Fx         | 18 | 0.0%          | 0.01 (0.01, 0.40)               | 0.0%          | 0.10 (0.10, 1.49)               | 0.0%          | 0.00 (0.00, 0.12)               | 0.0%          | 0.01 (0.01, 0.03)               |
| 0         | Adu1Fx         | 20 | 0.0%          | 0.01 (0.01, 0.15)               | 0.0%          | 0.10 (0.10, 3.33)               | 0.0%          | 0.00 (0.00, 0.08)               | 0.0%          | 0.01 (0.01, 0.05)               |
| 226       | AduFx          | 17 | 100.0%        | 74.69 (25.95, 454.43)           | 100.0%        | 25.28 (3.37, 126.16)            | 100.0%        | 0.18 (0.06, 1.38)               | 87.5%         | 0.01 (0.01, 1.39)               |
| 226       | 2PedFx         | 20 | 100.0%        | 68.85 (13.14, 206.40)           | 85.0%         | 12.86 (0.32, 129.15)            | 100.0%        | 0.18 (0.01, 1.02)               | 68.4%         | 0.01 (0.01, 2.30)               |
| 226       | PedFx          | 19 | 100.0%        | 41.03 (7.69, 255.56)            | 73.7%         | 9.00 (0.10, 51.67)              | 89.5%         | 0.12 (0.00, 0.73)               | 57.9%         | 0.01 (0.01, 0.79)               |
| 226       | Adu2Fx         | 18 | 100.0%        | 93.51 (9.73, 425.28)            | 88.9%         | 14.97 (0.10, 90.56)             | 88.2%         | 0.23 (0.00, 1.21)               | 77.8%         | 0.01 (0.01, 4.09)               |
| 226       | Adu1Fx         | 20 | 100.0%        | 108.30 (8.49, 476.31)           | 80.0%         | 9.16 (0.10, 59.68)              | 85.0%         | 0.14 (0.00, 0.67)               | 50.0%         | 0.01 (0.01, 0.57)               |
| 286       | AduFx          | 17 | 100.0%        | 45.24 (11.51, 424.02)           | 88.2%         | 18.30 (1.15, 146.82)            | 76.5%         | 0.07 (0.00, 1.03)               | 58.8%         | 0.03 (0.01, 0.18)               |
| 286       | 2PedFx         | 20 | 100.0%        | 58.09 (7.33, 211.19)            | 70.0%         | 12.62 (0.10, 46.52)             | 75.0%         | 0.09 (0.00, 0.69)               | 45.0%         | 0.01 (0.01, 1.83)               |
| 286       | PedFx          | 19 | 100.0%        | 28.66 (4.40, 122.52)            | 73.7%         | 7.93 (0.10, 37.02)              | 89.5%         | 0.10 (0.00, 0.57)               | 57.9%         | 0.03 (0.01, 0.18)               |
| 286       | Adu2Fx         | 18 | 100.0%        | 51.29 (3.54, 337.26)            | 83.3%         | 9.22 (0.10, 47.61)              | 83.3%         | 0.13 (0.00, 0.70)               | 50.0%         | 0.03 (0.01, 1.68)               |
| 286       | Adu1Fx         | 20 | 100.0%        | 69.27 (5.33, 310.51)            | 60.0%         | 3.55 (0.10, 48.31)              | 65.0%         | 0.05 (0.00, 0.53)               | 25.0%         | 0.01 (0.01, 0.35)               |
| 376       | AduFx          | 17 | 100.0%        | 33.70 (3.53, 285.21)            | 70.6%         | 11.50 (0.10, 65.40)             | 94.1%         | 0.07 (0.01, 0.62)               | 52.9%         | 0.02 (0.01, 0.57)               |
| 376       | 2PedFx         | 19 | 100.0%        | 23.45 (2.44, 116.14)            | 68.4%         | 7.08 (0.58, 18.75)              | 89.5%         | 0.06 (0.00, 0.22)               | 52.6%         | 0.02 (0.01, 0.16)               |
| 376       | PedFx          | 19 | 100.0%        | 14.83 (0.82, 86.56)             | 52.6%         | 3.62 (0.35, 20.64)              | 84.2%         | 0.04 (0.00, 0.18)               | 21.1%         | 0.01 (0.01, 0.20)               |
| 376       | Adu2Fx         | 17 | 100.0%        | 20.59 (3.13, 84.35)             | 70.6%         | 4.89 (0.89, 27.03)              | 82.4%         | 0.06 (0.01, 0.35)               | 52.9%         | 0.04 (0.01, 1.20)               |
| 376       | Adu1Fx         | 19 | 100.0%        | 27.15 (2.88, 207.81)            | 42.1%         | 1.85 (0.10, 25.26)              | 78.9%         | 0.03 (0.01, 0.24)               | 10.5%         | 0.01 (0.01, 0.34)               |
| MAL102    |                |    |               |                                 |               |                                 |               |                                 |               |                                 |
| 1         | AduFx          | 7  | 100.0%        | 12.62 (5.25, 115.32)            | 71.4%         | 2.77 (0.65, 30.10)              | 85.7%         | 0.05 (0.01, 0.33)               | 42.9%         | 0.01 (0.01, 0.08)               |
| 1         | 2PedFx         | 6  | 100.0%        | 33.88 (16.21, 79.87)            | 100.0%        | 8.47 (5.74, 12.01)              | 100.0%        | 0.08 (0.03, 0.39)               | 33.3%         | 0.01 (0.01, 0.57)               |
| 1         | PedFx          | 8  | 100.0%        | 12.04 (1.86, 75.35)             | 42.9%         | 3.99 (0.46, 17.88)              | 87.5%         | 0.03 (0.01, 0.15)               | 25.0%         | 0.01 (0.01, 0.06)               |
| 1         | Adu2Fx         | 6  | 100.0%        | 34.40 (3.70, 77.77)             | 83.3%         | 5.01 (1.70, 21.01)              | 100.0%        | 0.05 (0.02, 0.12)               | 50.0%         | 0.04 (0.01, 0.11)               |
| 1         | Adu1Fx         | 9  | 100.0%        | 10.44 (2.01, 70.78)             | 11.1%         | 0.73 (0.10, 10.39)              | 66.7%         | 0.02 (0.00, 0.17)               | 11.1%         | 0.01 (0.01, 0.14)               |
| 22        | AduFx          | 7  | 100.0%        | 91.77 (16.43, 139.34)           | 100.0%        | 12.72 (5.11, 28.82)             | 100.0%        | 0.09 (0.06, 0.60)               | 28.6%         | 0.01 (0.01, 0.08)               |
| 22        | 2PedFx         | 6  | 100.0%        | 141.77 (53.87, 196.95)          | 100.0%        | 38.80 (23.05, 56.13)            | 100.0%        | 0.24 (0.09, 1.45)               | 66.7%         | 0.17 (0.01, 4.90)               |
| 22        | PedFx          | 8  | 100.0%        | 85.10 (10.40, 269.62)           | 87.5%         | 26.75 (1.77, 81.36)             | 100.0%        | 0.10 (0.03, 0.79)               | 37.5%         | 0.01 (0.01, 0.13)               |
| 22        | Adu2Fx         | 6  | 100.0%        | 137.98 (5.62, 275.03)           | 100.0%        | 30.18 (1.99, 39.99)             | 100.0%        | 0.14 (0.08, 0.57)               | 83.3%         | 0.13 (0.01, 1.00)               |
| 22        | Adu1Fx         | 9  | 100.0%        | 86.39 (10.56, 169.03)           | 88.9%         | 10.26 (0.10, 57.24)             | 100.0%        | 0.08 (0.02, 0.27)               | 11.1%         | 0.01 (0.01, 0.19)               |
| 190       | AduFx          | 7  | 100.0%        | 21.33 (4.78, 158.23)            | 100.0%        | 4.55 (1.70, 9.32)               | 100.0%        | 0.05 (0.02, 0.67)               | 28.6%         | 0.01 (0.01, 0.06)               |
| 190       | 2PedFx         | 6  | 100.0%        | 55.68 (28.13, 107.81)           | 100.0%        | 19.38 (10.28, 23.33)            | 100.0%        | 0.10 (0.04, 0.45)               | 33.3%         | 0.01 (0.01, 0.83)               |
| 190       | PedFx          | 8  | 100.0%        | 34.52 (3.96, 72.07)             | 62.5%         | 4.43 (0.64, 29.83)              | 100.0%        | 0.04 (0.02, 0.34)               | 25.0%         | 0.02 (0.01, 0.05)               |
| 190       | Adu2Fx         | 6  | 100.0%        | 39.90 (3.59, 117.90)            | 100.0%        | 8.60 (1.79, 29.60)              | 100.0%        | 0.08 (0.03, 0.26)               | 83.3%         | 0.08 (0.01, 0.27)               |
| 190       | Adu1Fx         | 8  | 100.0%        | 11.23 (3.85, 29.49)             | 37.5%         | 1.40 (0.10, 4.95)               | 62.5%         | 0.03 (0.01, 0.20)               | 0.0%          | 0.01 (0.01, 0.11)               |



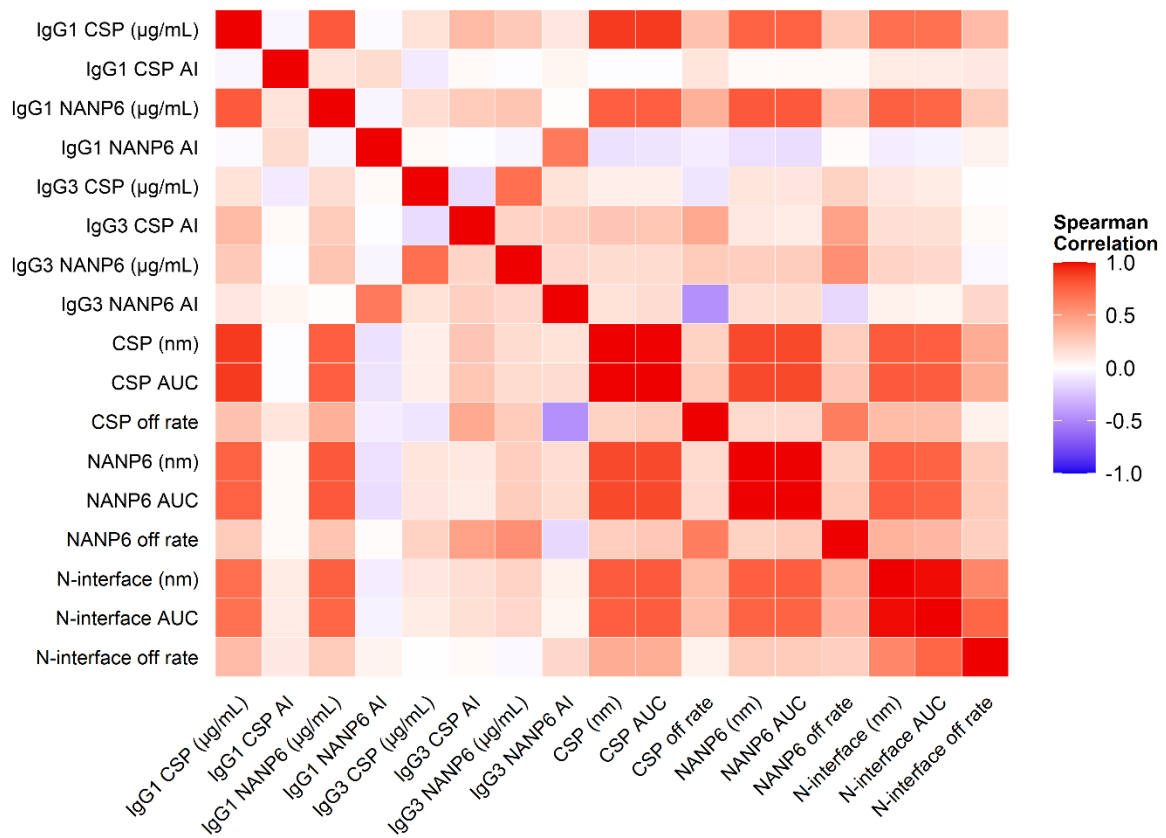

**Supplemental Figure 6. Correlation of humoral immune measures.** A heatmap of Spearman's rank correlation coefficients between measurements across the MAL092 and MAL102 studies is displayed. Intra-assay correlations are shown in the upper left quadrant (BAMA IgG subclass measurements) and lower right quadrant (BLI serum measurements). Inter-assay correlations are shown in the upper right and lower left quadrants.

**Supplemental Table 4. Correlation of humoral immune measures.** Spearman's rank correlation coefficients between measurements across the MAL092 and MAL102 studies as displayed in S6 Fig. ns = non-significant ( $P>0.05$ ).

|                                       | IgG1 CSP<br>( $\mu\text{g/mL}$ ) | IgG1 CSP<br>AI            | IgG1<br>NANP6<br>( $\mu\text{g/mL}$ ) | IgG1<br>NANP6<br>AI       | IgG3 CSP<br>( $\mu\text{g/mL}$ ) | IgG3 CSP<br>AI            | IgG3<br>NANP6<br>( $\mu\text{g/mL}$ ) | IgG3<br>NANP6<br>AI       | CSP (nm)                  | CSP AUC                   | CSP off<br>rate           | NANP6<br>(nm)             | NANP6<br>AUC              | NANP6<br>off rate         | N-<br>interface<br>(nm)   | N-<br>interface<br>AUC    | N-<br>interface<br>off rate |
|---------------------------------------|----------------------------------|---------------------------|---------------------------------------|---------------------------|----------------------------------|---------------------------|---------------------------------------|---------------------------|---------------------------|---------------------------|---------------------------|---------------------------|---------------------------|---------------------------|---------------------------|---------------------------|-----------------------------|
| IgG1<br>CSP<br>( $\mu\text{g/mL}$ )   | $r=1.00$<br>( $P<0.001$ )        | ns                        | $r=0.79$<br>( $P<0.001$ )             | ns                        | ns                               | $r=0.35$<br>( $P=0.023$ ) | $r=0.27$<br>( $P=0.007$ )             | ns                        | $r=0.90$<br>( $P<0.001$ ) | $r=0.90$<br>( $P<0.001$ ) | $r=0.31$<br>( $P=0.012$ ) | $r=0.76$<br>( $P<0.001$ ) | $r=0.76$<br>( $P<0.001$ ) | ns                        | $r=0.71$<br>( $P<0.001$ ) | $r=0.69$<br>( $P<0.001$ ) | $r=0.34$<br>( $P=0.036$ )   |
| IgG1<br>CSP AI                        | ns                               | $r=1.00$<br>( $P<0.001$ ) | ns                                    | ns                        | ns                               | ns                        | ns                                    | ns                        | ns                        | ns                        | ns                        | ns                        | ns                        | ns                        | ns                        | ns                        | ns                          |
| IgG1<br>NANP6<br>( $\mu\text{g/mL}$ ) | $r=0.79$<br>( $P<0.001$ )        | ns                        | $r=1.00$<br>( $P<0.001$ )             | ns                        | ns                               | ns                        | $r=0.29$<br>( $P=0.004$ )             | ns                        | $r=0.77$<br>( $P<0.001$ ) | $r=0.77$<br>( $P<0.001$ ) | $r=0.40$<br>( $P=0.001$ ) | $r=0.80$<br>( $P<0.001$ ) | $r=0.80$<br>( $P<0.001$ ) | ns                        | $r=0.77$<br>( $P<0.001$ ) | $r=0.74$<br>( $P<0.001$ ) | ns                          |
| IgG1<br>NANP6<br>AI                   | ns                               | ns                        | ns                                    | $r=1.00$<br>( $P<0.001$ ) | ns                               | ns                        | ns                                    | $r=0.66$<br>( $P=0.008$ ) | ns                        | ns                        | ns                        | ns                        | ns                        | ns                        | ns                        | ns                        | ns                          |
| IgG3<br>CSP<br>( $\mu\text{g/mL}$ )   | ns                               | ns                        | ns                                    | ns                        | $r=1.00$<br>( $P<0.001$ )        | ns                        | $r=0.70$<br>( $P<0.001$ )             | ns                        | ns                        | ns                        | ns                        | ns                        | ns                        | ns                        | ns                        | ns                        | ns                          |
| IgG3<br>CSP AI                        | $r=0.35$<br>( $P=0.023$ )        | ns                        | ns                                    | ns                        | ns                               | $r=1.00$<br>( $P<0.001$ ) | ns                                    | ns                        | ns                        | ns                        | $r=0.43$<br>( $P=0.017$ ) | ns                        | ns                        | $r=0.47$<br>( $P=0.031$ ) | ns                        | ns                        | ns                          |
| IgG3<br>NANP6<br>( $\mu\text{g/mL}$ ) | $r=0.27$<br>( $P=0.007$ )        | ns                        | $r=0.29$<br>( $P=0.004$ )             | ns                        | $r=0.70$<br>( $P<0.001$ )        | ns                        | $r=1.00$<br>( $P<0.001$ )             | ns                        | ns                        | ns                        | $r=0.26$<br>( $P=0.039$ ) | $r=0.25$<br>( $P=0.015$ ) | $r=0.25$<br>( $P=0.014$ ) | $r=0.56$<br>( $P<0.001$ ) | $r=0.22$<br>( $P=0.037$ ) | ns                        | ns                          |
| IgG3<br>NANP6<br>AI                   | ns                               | ns                        | ns                                    | $r=0.66$<br>( $P=0.008$ ) | ns                               | ns                        | ns                                    | $r=1.00$<br>( $P<0.001$ ) | ns                        | ns                        | ns                        | ns                        | ns                        | ns                        | ns                        | ns                        | ns                          |
| CSP<br>(nm)                           | $r=0.90$<br>( $P<0.001$ )        | ns                        | $r=0.77$<br>( $P<0.001$ )             | ns                        | ns                               | ns                        | ns                                    | ns                        | $r=1.00$<br>( $P<0.001$ ) | $r=1.00$<br>( $P<0.001$ ) | ns                        | $r=0.85$<br>( $P<0.001$ ) | $r=0.86$<br>( $P<0.001$ ) | ns                        | $r=0.79$<br>( $P<0.001$ ) | $r=0.77$<br>( $P<0.001$ ) | $r=0.42$<br>( $P=0.010$ )   |
| CSP<br>AUC                            | $r=0.90$<br>( $P<0.001$ )        | ns                        | $r=0.77$<br>( $P<0.001$ )             | ns                        | ns                               | ns                        | ns                                    | ns                        | $r=1.00$<br>( $P<0.001$ ) | $r=1.00$<br>( $P<0.001$ ) | $r=0.26$<br>( $P=0.035$ ) | $r=0.85$<br>( $P<0.001$ ) | $r=0.86$<br>( $P<0.001$ ) | ns                        | $r=0.79$<br>( $P<0.001$ ) | $r=0.78$<br>( $P<0.001$ ) | $r=0.41$<br>( $P=0.011$ )   |
| CSP off<br>rate                       | $r=0.31$<br>( $P=0.012$ )        | ns                        | $r=0.40$<br>( $P=0.001$ )             | ns                        | ns                               | $r=0.43$<br>( $P=0.017$ ) | $r=0.26$<br>( $P=0.039$ )             | ns                        | ns                        | $r=0.26$<br>( $P=0.035$ ) | $r=1.00$<br>( $P<0.001$ ) | ns                        | ns                        | $r=0.64$<br>( $P<0.001$ ) | $r=0.34$<br>( $P=0.006$ ) | $r=0.33$<br>( $P=0.008$ ) | ns                          |
| NANP6<br>(nm)                         | $r=0.76$<br>( $P<0.001$ )        | ns                        | $r=0.80$<br>( $P<0.001$ )             | ns                        | ns                               | ns                        | $r=0.25$<br>( $P=0.015$ )             | ns                        | $r=0.85$<br>( $P<0.001$ ) | $r=0.85$<br>( $P<0.001$ ) | ns                        | $r=1.00$<br>( $P<0.001$ ) | $r=1.00$<br>( $P<0.001$ ) | ns                        | $r=0.77$<br>( $P<0.001$ ) | $r=0.75$<br>( $P<0.001$ ) | ns                          |
| NANP6<br>AUC                          | $r=0.76$<br>( $P<0.001$ )        | ns                        | $r=0.80$<br>( $P<0.001$ )             | ns                        | ns                               | ns                        | $r=0.25$<br>( $P=0.014$ )             | ns                        | $r=0.86$<br>( $P<0.001$ ) | $r=0.86$<br>( $P<0.001$ ) | ns                        | $r=1.00$<br>( $P<0.001$ ) | $r=1.00$<br>( $P<0.001$ ) | ns                        | $r=0.77$<br>( $P<0.001$ ) | $r=0.75$<br>( $P<0.001$ ) | ns                          |
| NANP6<br>off rate                     | ns                               | ns                        | ns                                    | ns                        | ns                               | $r=0.47$<br>( $P=0.031$ ) | $r=0.56$<br>( $P<0.001$ )             | ns                        | ns                        | ns                        | $r=0.64$<br>( $P<0.001$ ) | ns                        | ns                        | $r=1.00$<br>( $P<0.001$ ) | $r=0.38$<br>( $P=0.012$ ) | $r=0.36$<br>( $P=0.020$ ) | ns                          |
| N-<br>interface<br>(nm)               | $r=0.71$<br>( $P<0.001$ )        | ns                        | $r=0.77$<br>( $P<0.001$ )             | ns                        | ns                               | ns                        | $r=0.22$<br>( $P=0.037$ )             | ns                        | $r=0.79$<br>( $P<0.001$ ) | $r=0.79$<br>( $P<0.001$ ) | $r=0.34$<br>( $P=0.006$ ) | $r=0.77$<br>( $P<0.001$ ) | $r=0.77$<br>( $P<0.001$ ) | $r=0.38$<br>( $P=0.012$ ) | $r=1.00$<br>( $P<0.001$ ) | $r=0.99$<br>( $P<0.001$ ) | $r=0.60$<br>( $P<0.001$ )   |
| N-<br>interface<br>AUC                | $r=0.69$<br>( $P<0.001$ )        | ns                        | $r=0.74$<br>( $P<0.001$ )             | ns                        | ns                               | ns                        | ns                                    | ns                        | $r=0.77$<br>( $P<0.001$ ) | $r=0.78$<br>( $P<0.001$ ) | $r=0.33$<br>( $P=0.008$ ) | $r=0.75$<br>( $P<0.001$ ) | $r=0.75$<br>( $P<0.001$ ) | $r=0.36$<br>( $P=0.020$ ) | $r=0.99$<br>( $P<0.001$ ) | $r=1.00$<br>( $P<0.001$ ) | $r=0.74$<br>( $P<0.001$ )   |
| N-<br>interface<br>off rate           | $r=0.34$<br>( $P=0.036$ )        | ns                        | ns                                    | ns                        | ns                               | ns                        | ns                                    | ns                        | $r=0.42$<br>( $P=0.010$ ) | $r=0.41$<br>( $P=0.011$ ) | ns                        | ns                        | ns                        | ns                        | $r=0.60$<br>( $P<0.001$ ) | $r=0.74$<br>( $P<0.001$ ) | $r=1.00$<br>( $P<0.001$ )   |

**Supplemental Table 5. Additional univariate logistic regression results.** Odds ratios, 95% confidence intervals, and raw and FDR-adjusted P-values obtained from unadjusted logistic regression models (Protection ~ immune measurement) and demographics and regimen-adjusted logistic regression models (Protection ~ Regimen + Age (years) + Sex + immune measurement) fit independently to each immune measurement based on MAL092 day of CHMI data. Age and sex terms did not contribute significantly to any model ( $p > 0.05$ ). Associations were considered statistically significant for FDR-adjusted P-values  $< 0.2$  (measurements in bold).

| Model Adjustment                            | Measurement                                 | Odds Ratio (95% CI)                    | P-value           | FDR-adjusted P-value |        |
|---------------------------------------------|---------------------------------------------|----------------------------------------|-------------------|----------------------|--------|
| Regimen, age, sex                           | <b>IgG1 CSP 334-hlgG1 equivalent</b>        | 2.75 (1.61, 5.07)                      | 0.0005            | 0.0020               |        |
|                                             | <b>IgG1 NANP6 334-hlgG1 equivalent</b>      | 2.63 (1.54, 4.90)                      | 0.0009            | 0.0027               |        |
|                                             | IgG3 CSP 334-hlgG3 equivalent               | 1.35 (0.87, 2.12)                      | 0.1831            | 0.2746               |        |
|                                             | IgG3 NANP6 334-hlgG3 equivalent             | 0.95 (0.61, 1.49)                      | 0.8213            | 0.8314               |        |
|                                             | IgG1 CSP AI                                 | 1.06 (0.68, 1.67)                      | 0.7844            | 0.8314               |        |
|                                             | IgG1 NANP6 AI                               | 1.06 (0.58, 1.87)                      | 0.8314            | 0.8314               |        |
|                                             | IgG3 CSP AI                                 | 1.89 (0.83, 4.99)                      | 0.1563            | 0.2679               |        |
|                                             | IgG3 NANP6 AI                               | 1.21 (0.29, 5.07)                      | 0.7809            | 0.8314               |        |
|                                             | <b>Serum CSP AUC<sub>diss</sub></b>         | 2.41 (1.46, 4.29)                      | 0.0012            | 0.0029               |        |
|                                             | <b>Serum NANP6 AUC<sub>diss</sub></b>       | 3.21 (1.74, 6.57)                      | 0.0005            | 0.0020               |        |
|                                             | <b>Serum N Interface AUC<sub>diss</sub></b> | 2.62 (1.61, 4.50)                      | 0.0002            | 0.0020               |        |
|                                             | Unadjusted                                  | <b>IgG1 CSP 334-hlgG1 equivalent</b>   | 2.12 (1.35, 3.50) | 0.0017               | 0.0042 |
|                                             |                                             | <b>IgG1 NANP6 334-hlgG1 equivalent</b> | 2.59 (1.58, 4.65) | 0.0005               | 0.0017 |
| IgG3 CSP 334-hlgG3 equivalent               |                                             | 1.32 (0.87, 2.02)                      | 0.1937            | 0.3551               |        |
| IgG3 NANP6 334-hlgG3 equivalent             |                                             | 1.05 (0.70, 1.61)                      | 0.8106            | 0.8916               |        |
| IgG1 CSP AI                                 |                                             | 1.08 (0.71, 1.66)                      | 0.7013            | 0.8916               |        |
| IgG1 NANP6 AI                               |                                             | 1.03 (0.59, 1.75)                      | 0.9150            | 0.9150               |        |
| IgG3 CSP AI                                 |                                             | 1.38 (0.74, 2.78)                      | 0.3167            | 0.4977               |        |
| IgG3 NANP6 AI                               |                                             | 1.19 (0.38, 3.48)                      | 0.7422            | 0.8916               |        |
| <b>Serum CSP AUC<sub>diss</sub></b>         |                                             | 2.18 (1.37, 3.70)                      | 0.0019            | 0.0042               |        |
| <b>Serum NANP6 AUC<sub>diss</sub></b>       |                                             | 3.22 (1.87, 6.13)                      | 0.0001            | 0.0006               |        |
| <b>Serum N Interface AUC<sub>diss</sub></b> |                                             | 2.71 (1.70, 4.51)                      | 0.0001            | 0.0006               |        |

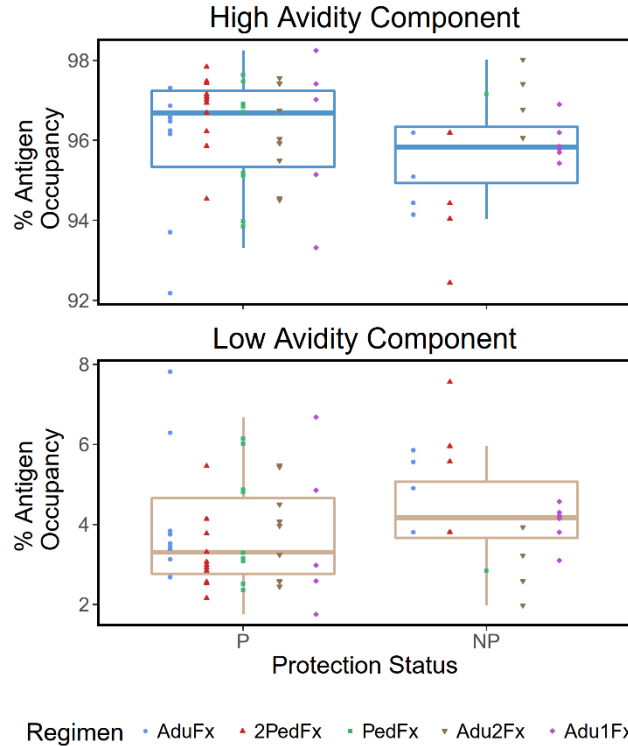

**Supplemental Figure 7. Protected RTS,S/AS01 vaccinees have higher antigen occupancy by high avidity antibodies.** The antigen occupancy by RTS,S-induced high avidity antibodies (top row) and low avidity antibodies (bottom row) are shown for PfCSP binding for MAL092 vaccinees' sera drawn at day 286 (90 days post-final immunization or day of 1<sup>st</sup> CHMI). The heterogeneity in avidity of vaccinees' serum antibodies were resolved using PAART. The difference in antigen occupancy of the high avidity component was not significantly different between protected and non-protected vaccinees ( $p = 0.073$ , Mann-Whitney  $U$  test).

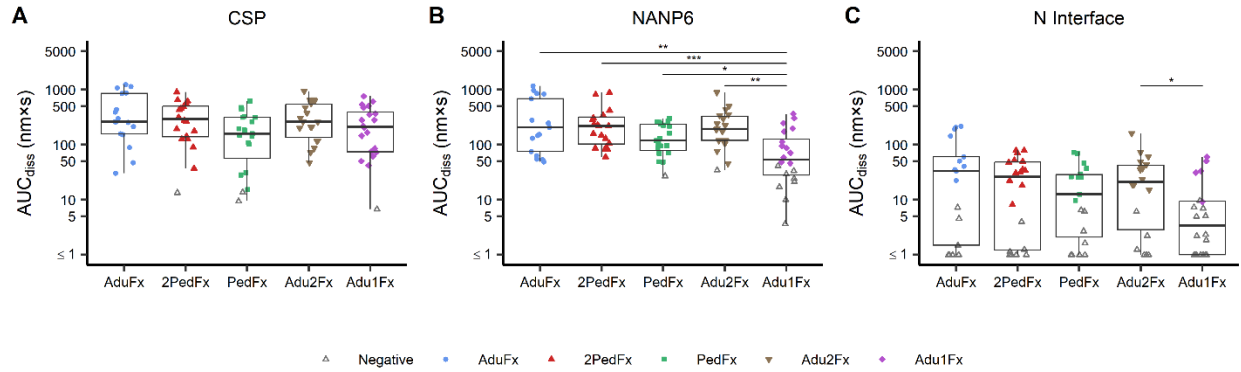

**Supplemental Figure 8. Serum Ig magnitude and avidity by regimen.** The  $AUC_{diss}$  values of vaccinees' MAL092 DoC (day 286, which is 90 days post-final immunization or day of 1<sup>st</sup> CHMI) serum interaction with CSP (**A**), NANP6 (**B**), and N Interface (**C**) are shown. Group comparisons with significant differences are indicated (\*  $P < 0.05$ , \*\*  $P < 0.01$ , \*\*\*  $P < 0.001$  by two-sided Mann-Whitney  $U$  test). All pairwise group comparisons were performed for all panels, and unless otherwise indicated,  $p > 0.05$ .

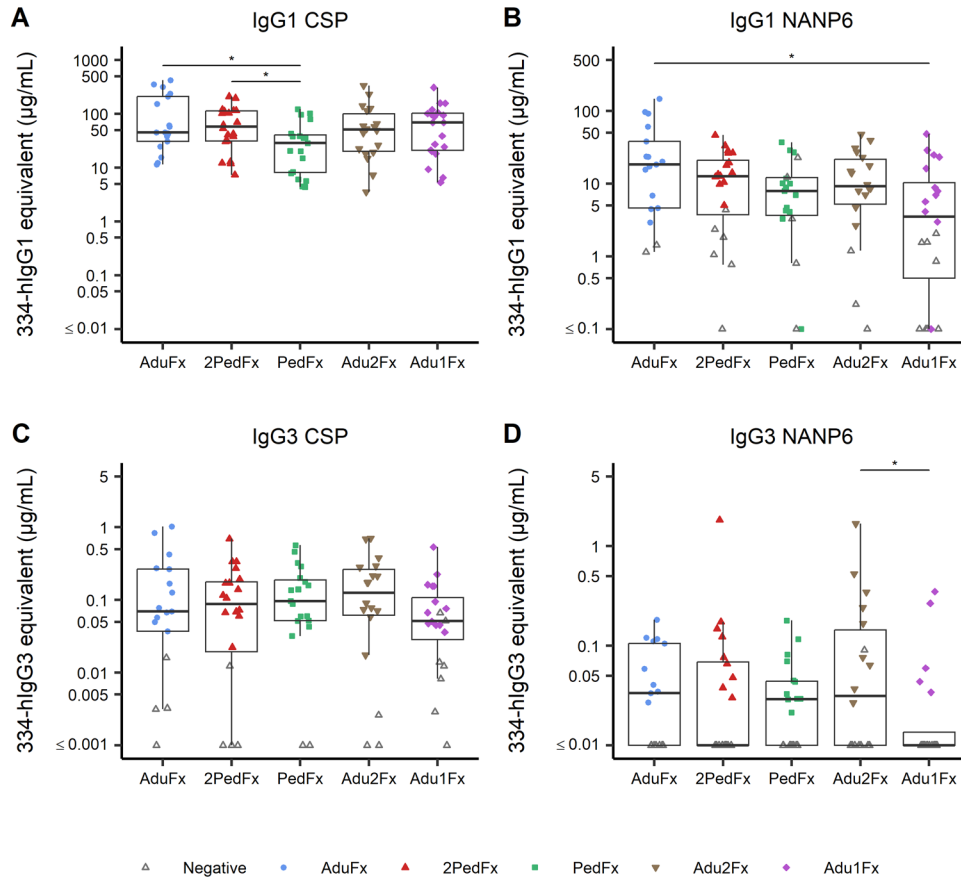

**Supplemental Figure 9. Antibody subclass binding magnitude by regimen.** The 334-hIgG1 or hIgG3 equivalent concentrations in vaccinee sera from MAL092 DoC (day 286) as in S8 Fig for IgG1 CSP (**A**), IgG1 NANP6 (**B**), IgG3 CSP (**C**), and IgG3 NANP6 (**D**) are shown. Group comparisons with significant differences are indicated (\*  $P < 0.05$  by two-sided Mann-Whitney  $U$  test). All pairwise group comparisons were performed for all panels, and unless otherwise indicated,  $p > 0.05$ . Note that all panels have different y-axis scales to best show group differences.

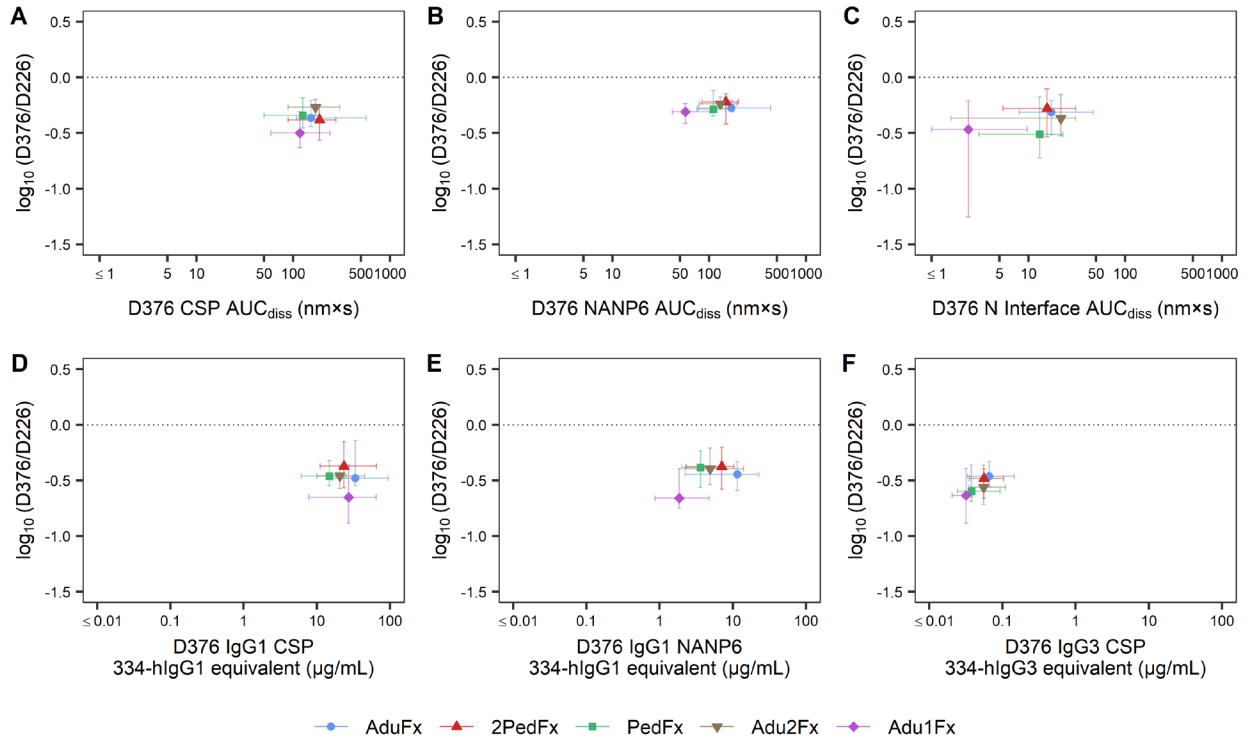

**Supplemental Figure 10. Six month durability of RTS,S/AS01 induced antibody responses.**

A plot of fold change in antibody responses in MAL092 from day 226 (30 days post-final immunization) to day 376 (180 days post-final immunization or 90 days post-1<sup>st</sup> CHMI) vs. day 376 antibody responses by RTS,S/AS01 regimen is shown for PfCSP-specific (**A**), NANP6-specific (**B**), and N Interface-specific (**C**)  $AUC_{diss}$ , IgG1 PfCSP (**D**), IgG1 NANP6 (**E**), and IgG3 CSP (**F**) 334-hIgG1/hIgG3 equivalent concentration. For each regimen, individual points represent median and error bars represent 25<sup>th</sup> to 75<sup>th</sup> percentiles. Horizontal line represents no change in antibody response from day 226 to day 376.
